# Supplementary material for: Modulation of CaV1.2 Channels by Mg2+ Acting at an EF-hand Motif in the COOH-terminal Domain
Source: PubMed Central journal article supplement — J Gen Physiol. 2005 Oct;126(4):311–23. doi: 10.1085/jgp.200509333 (PMC2266622; doi:10.1085/jgp.200509333), 2005-10
Supplement: jgenphysiol_jgp.200509333_1.pdf [file jgenphysiol_jgp.200509333_1.pdf]

**Supplementary Table 1. Activation and steady-state inactivation parameters**

**Activation**

| Constructs | 0.1 mM                  |                          |    | 0.25 mM                 |             |    | 0.8 mM                  |                          |    | 2.4 mM                  |             |    |
|------------|-------------------------|--------------------------|----|-------------------------|-------------|----|-------------------------|--------------------------|----|-------------------------|-------------|----|
|            | $V_{1/2}$ (mV)          | $k$ (mV)                 | n  | $V_{1/2}$ (mV)          | $k$ (mV)    | n  | $V_{1/2}$ (mV)          | $k$ (mV)                 | n  | $V_{1/2}$ (mV)          | $k$ (mV)    | n  |
| WT         | 14.7 ± 0.6 <sup>b</sup> | -14.8 ± 0.6 <sup>b</sup> | 20 | 2.3 ± 0.6               | -12.2 ± 0.5 | 23 | 2.6 ± 0.3               | -10.6 ± 0.2              | 64 | 2.1 ± 0.7               | -12.4 ± 0.6 | 16 |
| D1546A     | ND                      | ND                       |    | 7.9 ± 0.6 <sup>b</sup>  | -12.9 ± 0.5 | 13 | 1.7 ± 0.5               | -10.2 ± 0.4              | 28 | -3.8 ± 0.4 <sup>b</sup> | -9.6 ± 0.4  | 16 |
| D1546N     | 9.7 ± 0.7               | -13.5 ± 0.6              | 6  | 7.0 ± 0.8 <sup>b</sup>  | -13.7 ± 0.8 | 13 | 0.2 ± 0.7               | -12.1 ± 0.7              | 44 | -3.8 ± 0.4 <sup>b</sup> | -9.5 ± 0.4  | 16 |
| D1546S     | 7.9 ± 0.8 <sup>b</sup>  | -13.8 ± 0.8              | 10 | 0.1 ± 0.8               | -12.2 ± 0.7 | 15 | 0.9 ± 0.5               | -10.7 ± 0.5              | 35 | -8.7 ± 0.4 <sup>b</sup> | -7.5 ± 0.3  | 12 |
| D1546K     | 6.1 ± 0.6 <sup>b</sup>  | -12.6 ± 0.6              | 11 | -1.7 ± 0.9 <sup>b</sup> | -12.0 ± 0.9 | 8  | -8.2 ± 0.6 <sup>a</sup> | -9.8 ± 0.6               | 49 | -0.4 ± 0.7 <sup>b</sup> | -11.7 ± 0.6 | 18 |
| K1539D     | 23.4 ± 0.4 <sup>b</sup> | -15.2 ± 0.4              | 10 | 20.5 ± 0.7 <sup>b</sup> | -16.0 ± 0.6 | 17 | 9.7 ± 0.6 <sup>a</sup>  | -14.1 ± 0.6 <sup>a</sup> | 71 | 6.8 ± 0.9               | -13.1 ± 0.9 | 21 |
| K1543D     | 6.1 ± 0.5 <sup>b</sup>  | -12.5 ± 0.5              | 18 | 3.8 ± 0.3 <sup>b</sup>  | -11.5 ± 0.3 | 21 | -3.8 ± 0.3 <sup>a</sup> | -9.2 ± 0.3               | 47 | -2.5 ± 0.4              | -9.7 ± 0.3  | 9  |

**Inactivation**

| Constructs | 0.1 mM         |            |   | 0.25 mM        |            |    | 0.8 mM         |            |    | 2.4 mM                   |            |    |
|------------|----------------|------------|---|----------------|------------|----|----------------|------------|----|--------------------------|------------|----|
|            | $V_{1/2}$ (mV) | $k$ (mV)   | n | $V_{1/2}$ (mV) | $k$ (mV)   | n  | $V_{1/2}$ (mV) | $k$ (mV)   | n  | $V_{1/2}$ (mV)           | $k$ (mV)   | n  |
| WT         | -21.9 ± 1.2    | 13.2 ± 1.2 | 9 | -21.5 ± 1.1    | 9.1 ± 1.0  | 13 | -24.5 ± 0.7    | 9.9 ± 0.7  | 23 | -29.7 ± 0.6 <sup>b</sup> | 8.6 ± 0.5  | 8  |
| D1546A     | ND             | ND         |   | -21.0 ± 0.8    | 8.0 ± 0.7  | 10 | -21.1 ± 1.0    | 8.9 ± 0.9  | 12 | -31.2 ± 0.6 <sup>b</sup> | 8.4 ± 0.6  | 10 |
| D1546N     | -20.1 ± 2.2    | 10.6 ± 2.0 | 4 | -19.7 ± 1.0    | 8.3 ± 0.9  | 11 | -24.2 ± 0.7    | 8.1 ± 0.6  | 15 | -31.8 ± 0.6 <sup>b</sup> | 8.5 ± 0.5  | 10 |
| D1546S     | -20.1 ± 1.3    | 12.5 ± 1.2 | 5 | -25.2 ± 0.7    | 7.8 ± 0.6  | 9  | -22.1 ± 0.8    | 9.2 ± 0.8  | 29 | -29.9 ± 0.9 <sup>b</sup> | 9.0 ± 0.6  | 9  |
| D1546K     | -13.8 ± 1.5    | 11.9 ± 1.4 | 6 | -18.4 ± 1.3    | 10.6 ± 1.2 | 6  | -16.7 ± 1.8    | 15.7 ± 1.8 | 16 | -20.6 ± 1.4              | 13.6 ± 1.4 | 10 |
| K1539D     | -33.3 ± 3.9    | 17.2 ± 4.7 | 5 | -26.9 ± 2.4    | 11.0 ± 2.4 | 10 | -23.0 ± 1.2    | 11.0 ± 1.1 | 29 | -33.9 ± 0.7 <sup>b</sup> | 8.7 ± 0.7  | 10 |
| K1543D     | -25.1 ± 3.6    | 13.8 ± 3.8 | 9 | -27.5 ± 2.8    | 9.3 ± 2.6  | 13 | -25.8 ± 1.0    | 10.2 ± 1.0 | 21 | -32.5 ± 0.9 <sup>b</sup> | 8.7 ± 1.0  | 11 |

<sup>a</sup> Values are significantly (p < 0.001) different than WT parameters;

<sup>b</sup> Values are significantly (p < 0.001) different than 0.8mM Mg.

ND, Not determined
